# Supplementary material
Source: MDPI journal article supplement (https://www.mdpi.com/1999-4907/9/8/446)
Supplement: s1 [file s1]

## Supplemental Materials

# Plant Hydraulic Trait Covariation: A Global Meta-Analysis to Reduce Degrees of Freedom in Trait-Based Hydrologic Models

A. Rio Mursinna <sup>1</sup>, Erica McCormick <sup>1</sup>, Katie Van Horn <sup>2</sup>, Lisa Sartin <sup>3</sup> and Ashley M. Matheny <sup>1,\*</sup>

<sup>1</sup> Department of Geological Sciences, University of Texas at Austin, Austin, TX 78712, USA; riogeo@utexas.edu (A.R.M.); erica.mccormick@utexas.edu (E.M.)

<sup>2</sup> Austin Community College, 1218 West Ave. Austin, TX 78701, USA; mkvanhorn@gmail.com

<sup>3</sup> Department of Civil, Environmental, and Geodetic Engineering, Ohio State University, Columbus, OH 43210, USA; sartin.1@osu.edu

\* Correspondence: ashley.matheny@jsg.utexas.edu

**Table S1:** Outliers which were removed manually for extremophile species. Additional excluded outliers include conduit densities greater than 300 mm<sup>-1</sup>, root depths greater than 15 m, and precipitation values less than zero.

| Species                       | <i>a</i> | MAP  | Ψ <sub>50</sub> | K <sub>max</sub> | Wood density |
|-------------------------------|----------|------|-----------------|------------------|--------------|
| <i>Abies balsamea</i>         | 17.17    |      |                 |                  |              |
| <i>Astronium urundeuva</i>    |          |      |                 | 16.03            |              |
| <i>Betula occidentalis</i>    |          |      |                 | 10.00            |              |
| <i>Bursera simaruba</i>       |          |      |                 | 20.80            |              |
| <i>Cedrus atlantica</i>       | 13.21    |      |                 |                  |              |
| <i>Cordia alliodora</i>       |          |      |                 | 9.74             |              |
| <i>Dodonaea viscosa</i>       |          |      |                 |                  | 1.05         |
| <i>Garrya veatchii</i>        |          |      |                 |                  | 0.00         |
| <i>Hybanthus prunifolius</i>  |          |      |                 | 10.94            |              |
| <i>Juniperus monosperma</i>   | 25.21    |      | -11.28          |                  |              |
| <i>Leptospermum scoparium</i> |          |      |                 |                  | 1.03         |
| <i>Lomariopsis japurensis</i> |          | 4000 |                 |                  |              |
| <i>Lomariopsis vestita</i>    |          | 4000 |                 |                  |              |
| <i>Pinus elliottii</i>        |          |      |                 | 10.36            |              |
| <i>Populus deltoides</i>      |          |      |                 | 16.39            |              |
| <i>Populus trichocarpa</i>    | 15.62    |      |                 |                  |              |
| <i>Solanum riparium</i>       |          |      |                 | 11.29            |              |
| <i>Swartzia simplex</i>       |          |      |                 | 13.53            |              |
| <i>Tsuga canadensis</i>       | 15.26    |      |                 |                  |              |

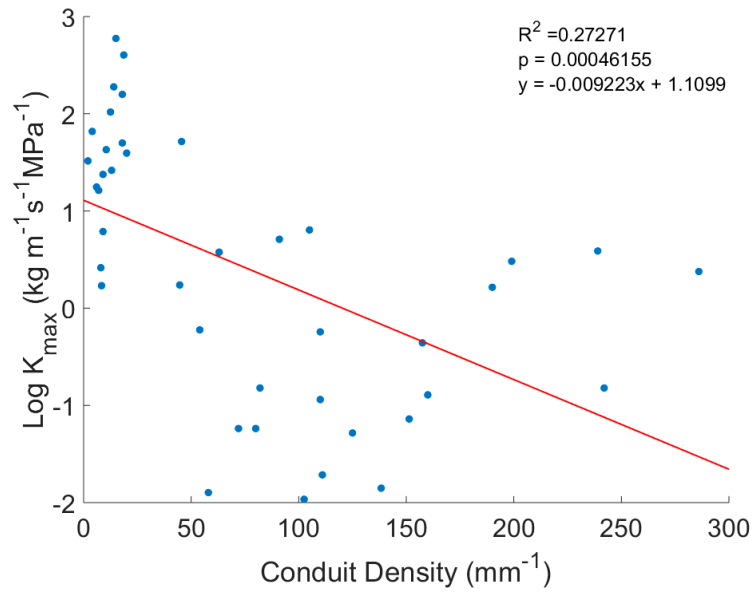

**Figure S1:** Log-transformed  $K_{\max}$  increases with lower conduit density ( $R^2 = 0.27$ ,  $p = 0.0005$ ), Markers represent individual species ( $n = 41$ ).

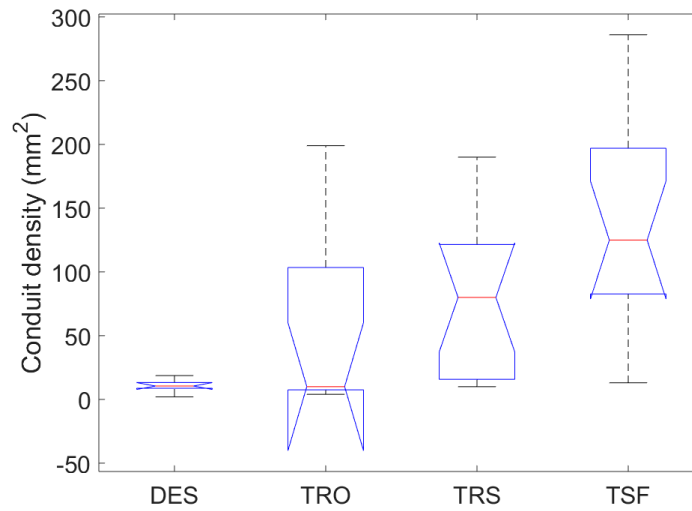

**Figure S2:** ANOVA analysis with conduit density per biomes desert (DES), tropical forest (TRO), tropical seasonal forest (TRS), temperate seasonal forest (TSF). Desert species have the lowest conduit density while tropical forests have the highest (Prob > F = .0019).

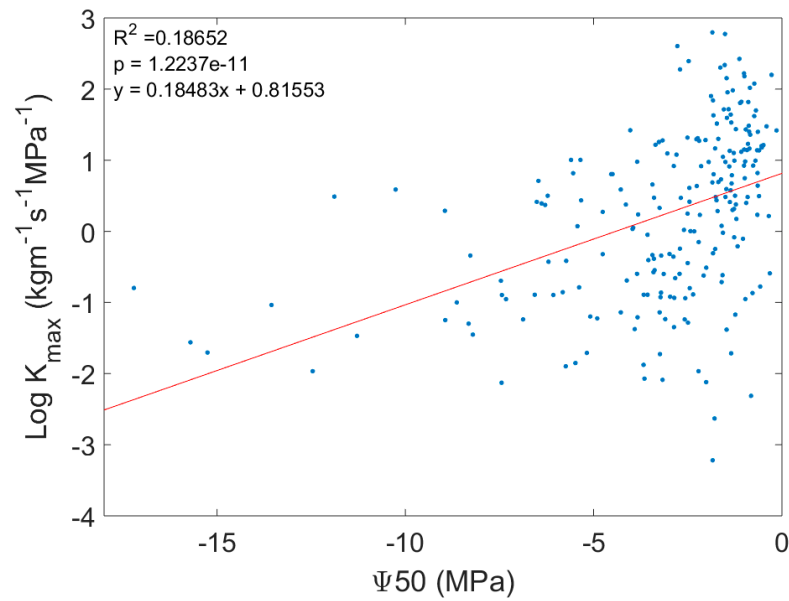

**Figure S3:** The positive linear relationship between log-transformed  $K_{\max}$  and the water potential at which 50% of hydraulic conductivity is lost ( $R^2 = 0.19$ ,  $p < 0.0001$ ), Markers represent individual species ( $n=225$ ).

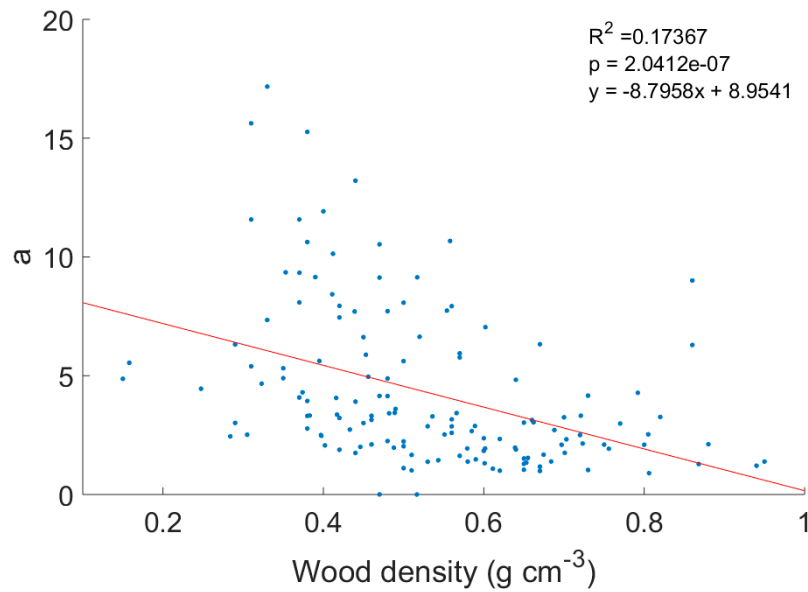

**Figure S4:** Increased wood density promotes resistance to embolism which can be seen as a lower  $a$ .  $a$  is representative of the steepness of the xylem cavitation curve at  $\Psi_{50}$ . Large values of  $a$  represent faster losses in conductivity with decreasing  $\Psi$ , while smaller values represent slower declines in conductivity. ( $R^2 = 0.17$ ,  $p < 0.0001$ ) Markers represent individual species ( $n = 144$ ).

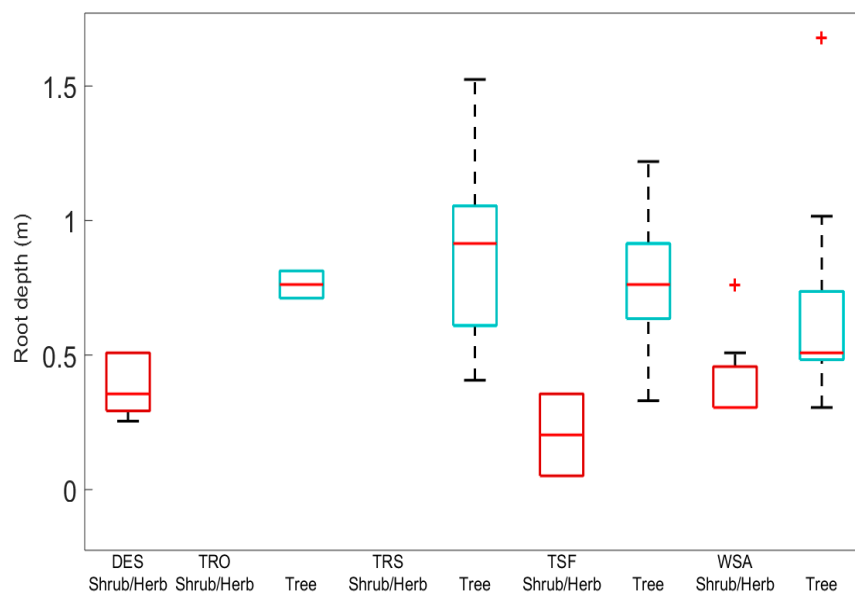

**Figure S5:** Rooting depth differs substantially across biomes with growth form. From left to right along the  $x$ -axis biomes are desert (DES), tropical forest (TRO), tropical-seasonal forest (TRS), temperate-seasonal forest (TSF), and woodland/shrubland (WSA). Trees tend to be more deeply rooted than shrubs and grasses. Missing bars are indicative of growth forms not represented within the data set for a particular biome.

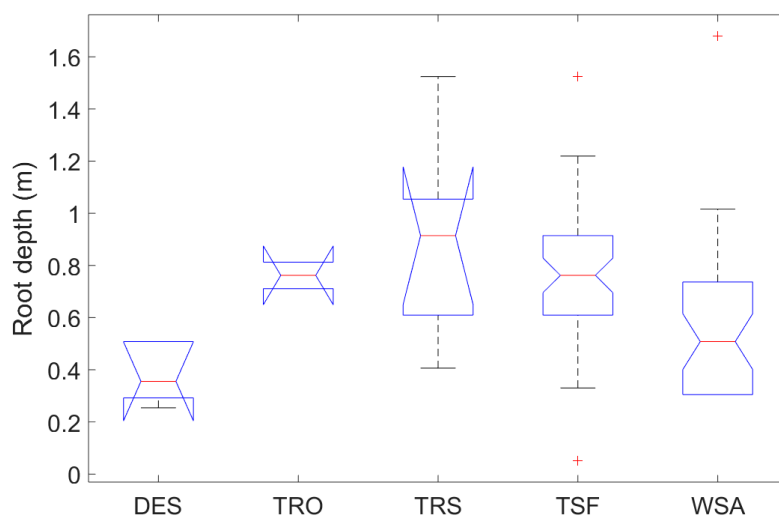

**Figure S6:** ANOVA analysis of rooting depth across desert (DES), tropical forest (TRO), tropical seasonal forest (TRS), temperate seasonal forest (TSF), and woodland/shrubland (WSA) categorized biomes (left to right) ( $\text{Prob} > F = .0004$ ).

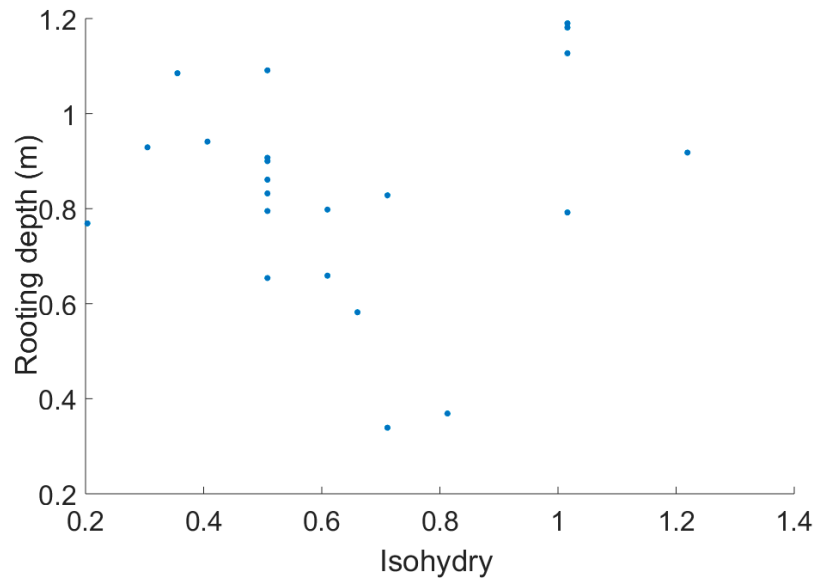

**Figure S7:** No significant relationship was found between isohydry and rooting depth for the 22 species for which data were available ( $p = 0.57$ )

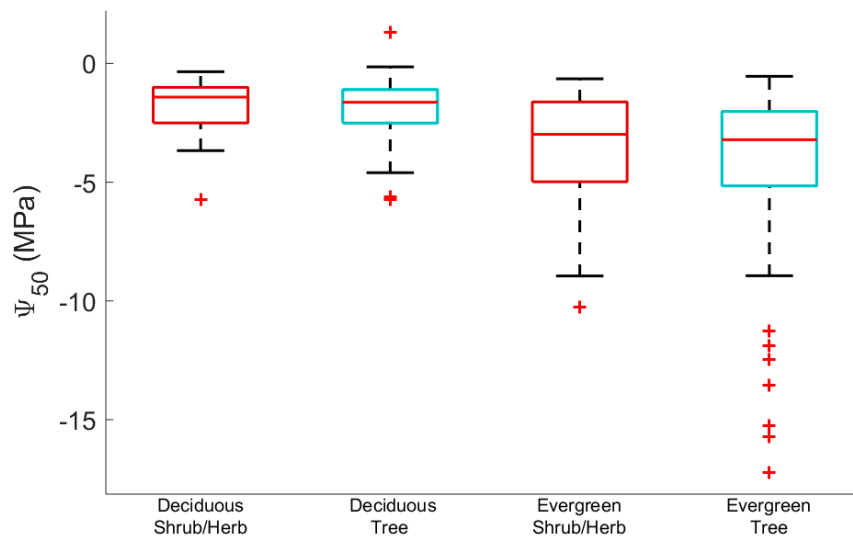

**Figure S8:** Evergreen trees withstand greater negative pressures than deciduous shrubs or herbs. While evergreen shrubs demonstrate a wider range of  $\Psi_{50}$  than deciduous species.
